# Supplementary material for: Flanking sequences influence the activity of TET1 and TET2 methylcytosine dioxygenases and affect genomic 5hmC patterns
Source: Springer Nature journal article supplement (doi:10.1038/s42003-022-03033-4), 2022-01-24
Supplement: 42003_2022_3033_MOESM3_ESM.pdf [file 42003_2022_3033_MOESM3_ESM.pdf]

## Description of Additional Supplementary Files

**File name:** Supplementary Data 1

**Description:** Relative oxidation rates of 5mC and 5hmC substrates in all NNCGNN sites by TET1 and TET2. This table compiles the data shown in Figure 2a.

**File name:** Supplementary Data 2

**Description:** Source data and uncropped images.
