# Supplementary material for: Flanking sequences influence the activity of TET1 and TET2 methylcytosine dioxygenases and affect genomic 5hmC patterns
Source: Commun Biol. 2022 Jan 24;5:92. doi: 10.1038/s42003-022-03033-4 (PMC8786823; doi:10.1038/s42003-022-03033-4)
Supplement: Supplementary file 2 — Supplementary information [file 42003_2022_3033_MOESM2_ESM.pdf]

# **Flanking sequences influence the activity of TET1 and TET2 methylcytosine dioxygenases and affect genomic 5hmC patterns**

Sabrina Adam, Julia Bräcker, Viviane Klingel, Bernd Osteresch, Nicole E. Radde, Jens Brockmeyer, Pavel Bashtrykov, Albert Jeltsch

## **Supplementary information**

### **Supplementary Tables**

Supplementary Table 1: Summary of the NGS sequencing data used in this study.

Supplementary Table 2: Results of no-enzyme control reactions.

Supplementary Table 3: Oligonucleotides and primers used for the Deep Enzymology experiments.

Supplementary Table 4: Oligonucleotides used for the TET oxidation kinetics and UHRF2 SRA DNA binding studies.

### **Supplementary Figures**

Supplementary Figure 1: Terminology and principles of the Deep Enzymology approach.

Supplementary Figure 2: Compilation of the correlation of mCG oxidation flank preferences.

Supplementary Figure 3: Compilation of the correlation of hmCG oxidation flank preferences.

Supplementary Figure 4: Determination of reaction rates for oxidation of 5mC and 5hmC in NNCGNN context.

Supplementary Figure 5: Correlation of the flanking sequence preferences of TET1, TET2, DNMT1, DNMT3A and DNMT3B.

Supplementary Figure 6: Additional data regarding the LC-MS TET activity assays.

Supplementary Figure 7: Fitting of kinetic data requires a processive reaction step.

Supplementary Figure 8: Compilation of the correlation of mCpX oxidation flank preferences.

Supplementary Figure 9: Comparison of genomic NNCGNN 5hmC patterns in lung and liver cells revealing very high similarity.

Supplementary Figure 10: Schematic drawing of the TET1 and TET2 enzyme constructs used in this study.

Supplementary Figure 11: Uncropped images of Figure 3d and e.

### **Supplementary References**

## Supplementary Tables

**Supplementary Table 1: Summary of the NGS sequencing data used in this study.**

| Substrate | Enzyme    | Repeat | c(TET) [ $\mu$ M] | total reads | sum    |
|-----------|-----------|--------|-------------------|-------------|--------|
| 5mCG      | TET1      | R1     | 1.3               | 28868       | 68539  |
|           |           | R2     | 1.3               | 14109       |        |
|           |           | R3     | 1.3               | 25562       |        |
|           | TET2 V1   | R1     | 2                 | 41124       | 178607 |
|           |           | R2     | 3                 | 14766       |        |
|           |           | R3     | 4                 | 15337       |        |
|           |           | R4     | 3                 | 50336       |        |
|           |           | R5     | 4                 | 57044       |        |
|           | TET2 V2   | R1     | 1.5               | 68389       | 178980 |
|           |           | R2     | 2.3               | 66053       |        |
|           |           | R3     | 3                 | 44538       |        |
|           | no enzyme | R1     | 0                 | 144545      | 144545 |
| 5hmCG     | TET1      | R1     | 2.6               | 92060       | 461761 |
|           |           | R2     | 2.6               | 99216       |        |
|           |           | R3     | 2.3               | 82171       |        |
|           |           | R4     | 2                 | 93378       |        |
|           |           | R5     | 2                 | 94936       |        |
|           | TET2 V1   | R1     | 4.4               | 85375       | 133495 |
|           |           | R2     | 4.4               | 48120       |        |
|           | TET2 V2   | R1     | 4                 | 43315       | 111154 |
|           |           | R2     | 4                 | 67839       |        |
|           | no enzyme | R1     | 0                 | 182237      | 182237 |
| 5mCX      | TET1      | R1     | 1.3               | 65996       | 140267 |
|           |           | R2     | 1.3               | 74271       |        |
|           | TET2 V2   | R1     | 3                 | 107425      | 207921 |
|           |           | R2     | 3                 | 100496      |        |
|           | no enzyme | R1     | 0                 | 34354       | 34354  |

**Supplementary Table 2: Results of no-enzyme control reactions.** No-enzyme control reactions were conducted with the hemimethylated and hemihydroxymethylated CpG substrates. In each case, readout of C was expected in the upper DNA strand after bisulfite conversion and readout of T in the lower DNA strand. The data confirm low rates of “overconversion” leading to T readout in the upper strand (0.3 %) and low rates of incomplete conversion leading to C readout in the lower strand (1-2 %).

| Substrate | Strand | Original base | Readout |        |
|-----------|--------|---------------|---------|--------|
|           |        |               | C (%)   | T (%)  |
| 5mCG      | upper  | 5mC           | 98.986  | 1.014  |
|           | lower  | C             | 0.338   | 99.662 |
| 5hmCG     | upper  | 5hmC          | 97.967  | 2.033  |
|           | lower  | C             | 0.302   | 99.698 |
| 5mCX      | upper  | 5mC           | 98.274  | 1.726  |
|           | lower  | C             | 0.342   | 99.758 |

**Supplementary Table 3: Oligonucleotides and primers used for the Deep Enzymology experiments.**

| Oligo            | Sequence                                                                      |
|------------------|-------------------------------------------------------------------------------|
| HM rand.         | GAGTGTGACTAGGCTCTCACTGCCNNNNNNNNNN mC GNNNNNNNNNNGAGAGGAGACCTAGTGAGAAG        |
| OH rand.         | GAGTGTGACTAGGCTCTCACTGCCNNNNNNNNNN hmC GNNNNNNNNNNGAGAGGAGACCTAGTGAGAAG       |
| CH rand.         | GAGTGTGACTAGGCTCTCACTGCCNNNNNNNNNN mC HNNNNNNNNNNGAGAGGAGACCTAGTGAGAAG        |
| Extension primer | CTTCTCACTAGGTCTCC                                                             |
| Hairpin          | pGAGAAGGGATGTGGATACACATCCCT                                                   |
| PCR1 fwd         | ACACTCTTCCCTACACGACGCTCTCCGATCTNNNNNN <u>NATAGAGTGTGATTAGGTTTTATTGTT</u>      |
| PCR1 rev         | GTGACTGGAGTTCAGACGTGTGCTCTCCGATCTNNNNNN <u>TACAAATATAACTAACTCTCACTAAC</u>     |
| PCR2 fwd         | AATGATACGGCGACCACCGAGATCTACAC <u>ATTACTCG</u> ACACTCTTCCCTACACGACGCTCTCCGATCT |
| PCR2 rev         | AATGATACGGCGACCACCGAGATCTACAC <u>CCGGAGA</u> ACACTCTTCCCTACACGACGCTCTCCGATCT  |

Exemplary barcode and index parts are underlined. N refers to random nucleotides.

**Supplementary Table 4: Oligonucleotides used for the TET oxidation kinetics and UHRF2 SRA DNA binding studies.**

| <b>Oligo</b> | <b>Sequence</b>                    |
|--------------|------------------------------------|
| TET-pref     | GAAGCTGGGACTTACGTAAGGAGAGTGCAA     |
| TET-pref-mC  | GAAGCTGGGACTTA mC GTAAGGAGAGTGCAA  |
| TET-pref-hmc | GAAGCTGGGACTTA hmC GTAAGGAGAGTGCAA |
| TET-pref-rev | TTGCACTCTCCTTACGTAAGTCCCAGCTTC     |
| TET-disf     | GAAGCTGGGACGCGCGCCGGGAGAGTGCAA     |
| TET-disf-mC  | GAAGCTGGGACGCG mC GCCGGGAGAGTGCAA  |
| TET-disf-hmc | GAAGCTGGGACGCG hmC GCCGGGAGAGTGCAA |
| TET-disf-rev | TTGCACTCTCCCGGCGCGTCCCAGCTTC       |

## Supplementary Figures

**Supplementary Figure 1: Terminology and principles of the Deep Enzymology approach.** **a** Terminology used in this document to describe the DNA substrate. The target sites of the TET enzymes include CpG and non-CpG sites. Target residues for oxidation are either 5mC or 5hmC. **b** Principle workflow of the Deep Enzymology approach<sup>1</sup>. Second strand synthesis using synthetic oligonucleotides with mCpG site in random N<sub>10</sub> flank context as template (step 1). Oxidation of the pool of sequences by TET enzymes (step 2). Hairpin ligation (step 3) and bisulfite conversion (step 4). Generation of sequencing libraries by addition of barcodes and indices (Step 5), and Illumina sequencing (step 6). Extraction of original sequences and cytosine oxidation state followed by downstream analysis (step 7). **c** Principle of the detection of 5-methylcytosine oxidation by bisulfite conversion. The scheme indicates the different oxidation states of 5-methylcytosine and its readout after bisulfite conversion illustrating that the transition of 5hmC to 5fC is detected by this technology.

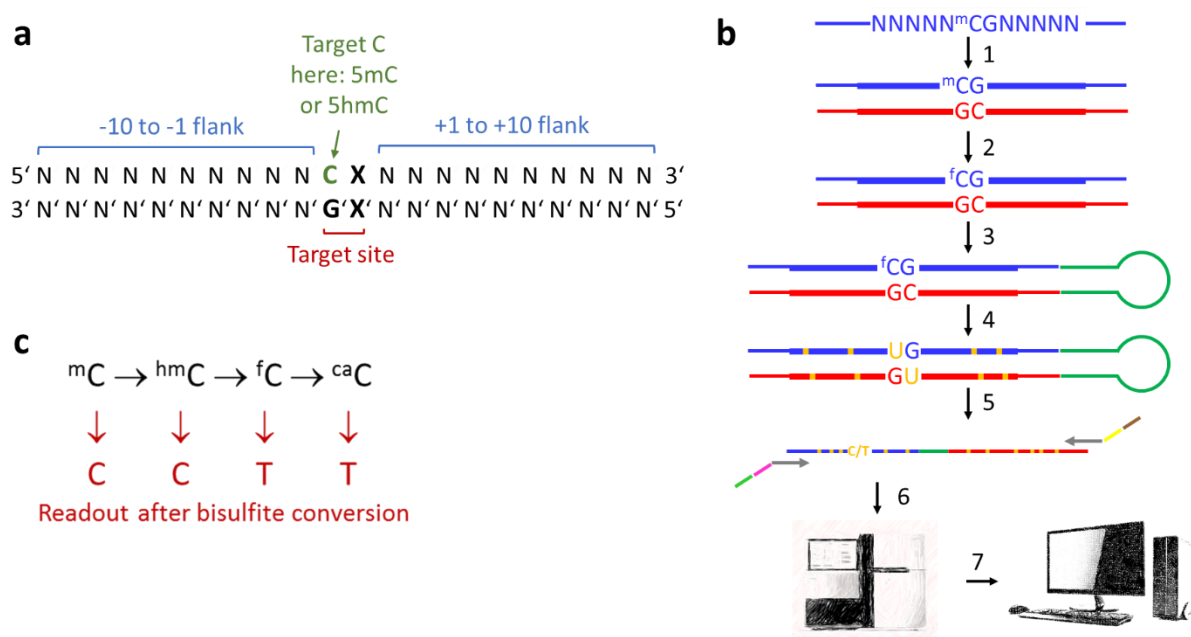

**Supplementary Figure 2: Compilation of the correlation of mCG oxidation flank preferences.** **a** Correlation of NNmCGNN flank preferences observed in the individual experimental repeats with TET1, TET2 V1 and TET2 V2. **b** Heatmap of the averaged oxidation activities of TET1, TET2 V1 and TET2 V2 at NNmCGNN sites sorted by the average activity. The heatmap scale is between zero and the relative maximum of each sample. **c** Correlation of the averaged NNmCGNN flank preferences of TET1, TET2 V1 and TET2 V2. In panels a and c, Pearson correlation factors are shown. Note, the very high similarity of TET2 V1 and TET2 V2.

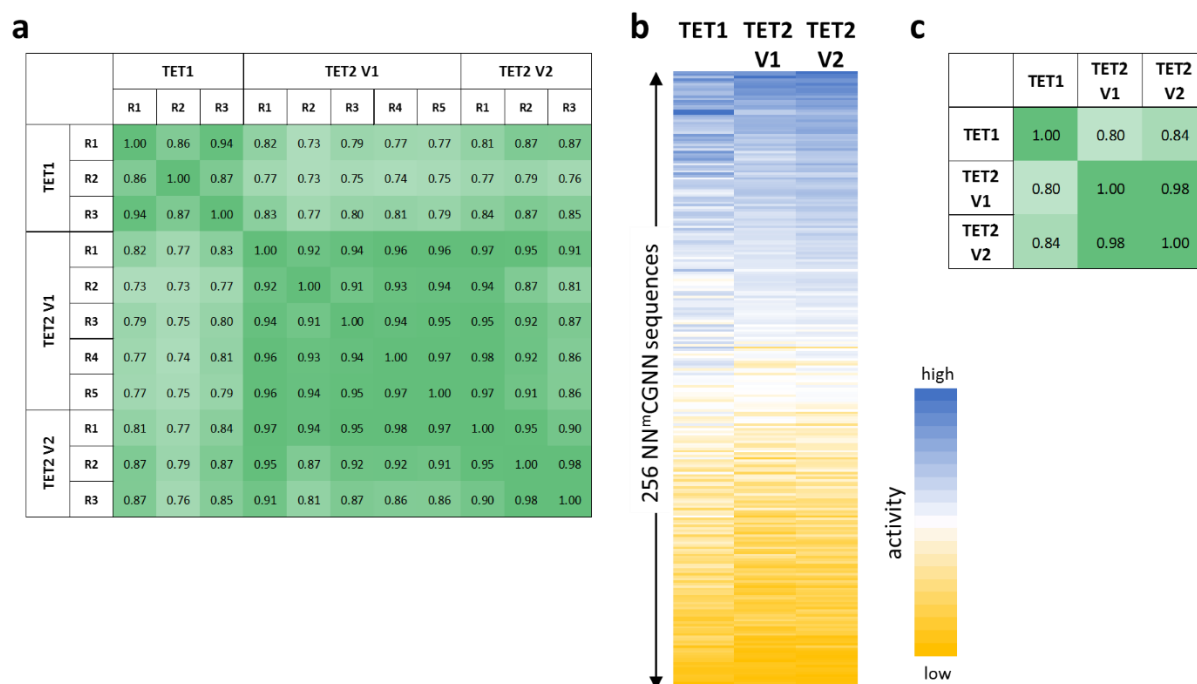

**Supplementary Figure 3: Compilation of the correlation of hmCG oxidation flank preferences. a** Correlation of NNhmCGNN flank preferences observed in the individual experimental repeats with TET1, TET2 V1 and TET2 V2. **b** Heatmap of the averaged oxidation activities of TET1, TET2 V1 and TET2 V2 at NNhmCGNN sites sorted by the average activity. The heatmap scale is between zero and the relative maximum of each sample. **c** Correlation of the averaged NNmCGNN (taken from Supplementary Figure 2) and NNhmCGNN flank preferences of TET1, TET2 V1 and TET2 V2. In a and c Pearson correlation factors are shown. Note, the very high similarity of TET2 V1 and TET2 V2.

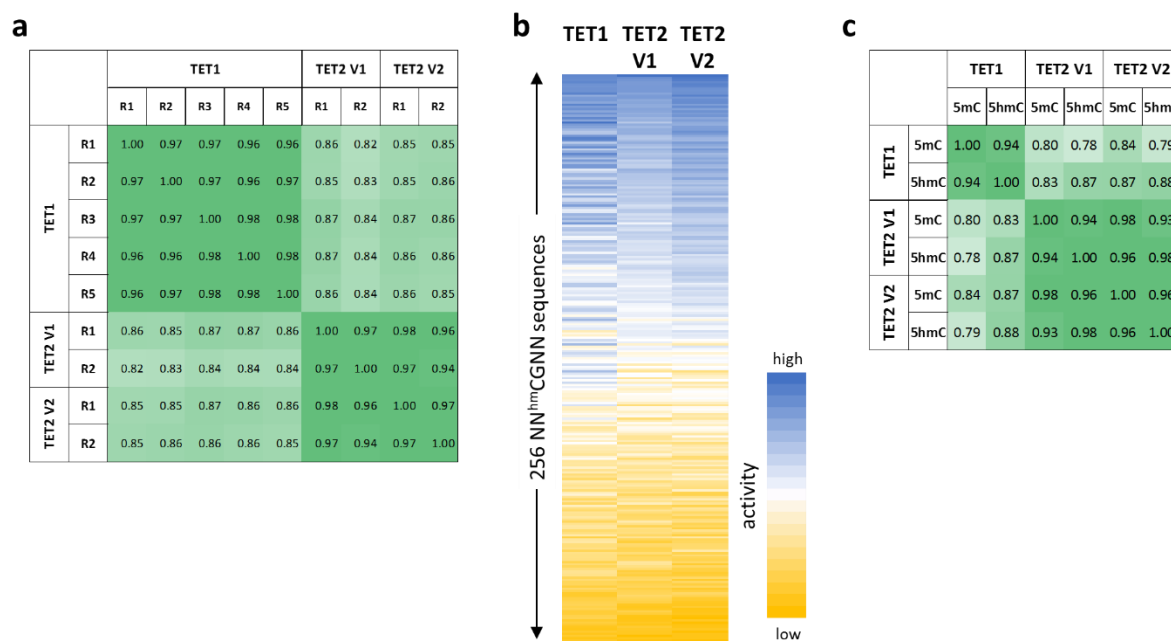

**Supplementary Figure 4: Determination of reaction rates for oxidation of 5mC and 5hmC in NNCGNN context.** The figures show examples of the primary data and fit curves.

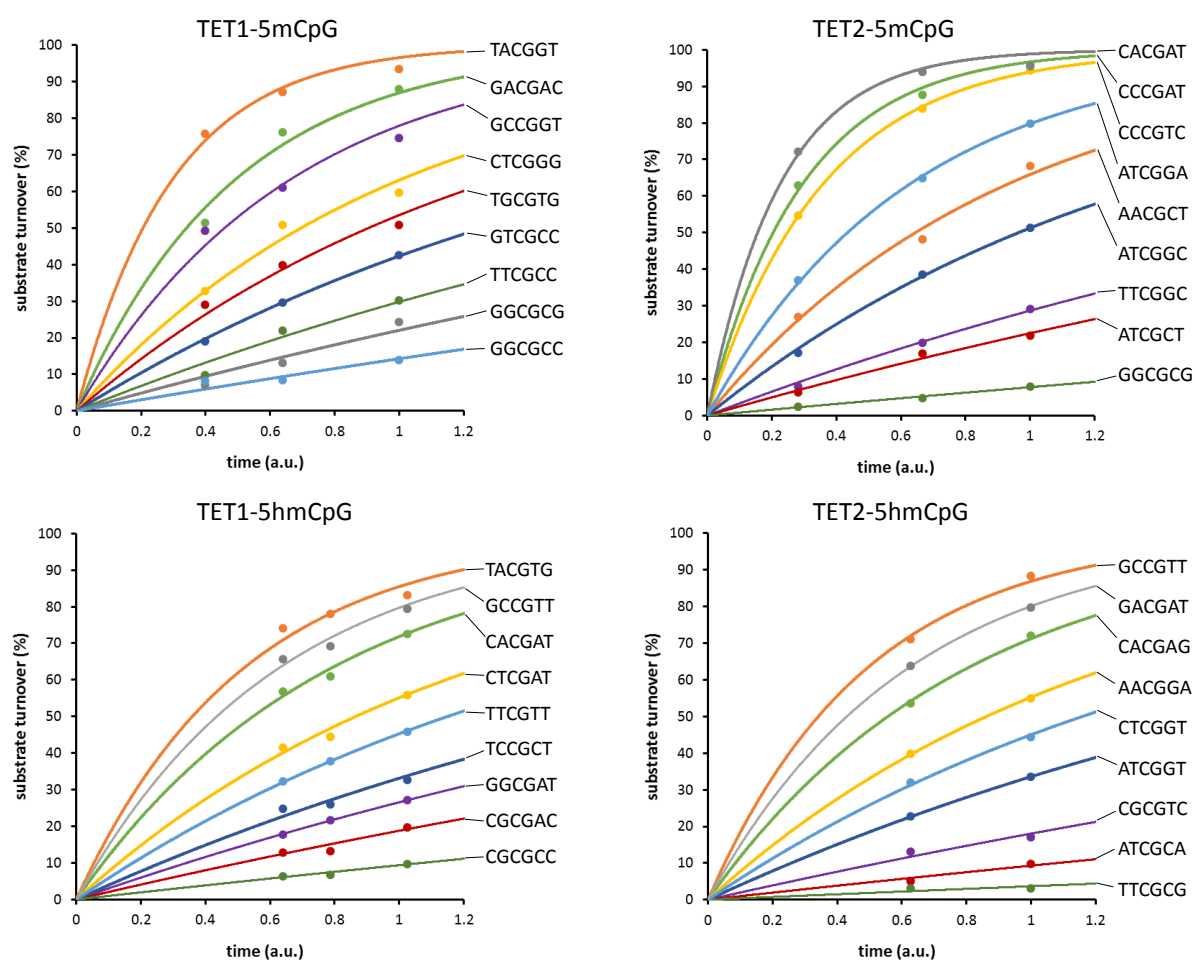

**Supplementary Figure 5: Correlation of the flanking sequence preferences of TET1, TET2, DNMT1, DNMT3A and DNMT3B.** Pearson correlation factors of the TET1 and TET2 5mCG oxidation NNCGNN flanking sequence preferences determined here with previously published CpG methylation preferences of DNMT1 <sup>2</sup> and DNMT3A and DNMT3B <sup>3</sup>.

|        | TET1 | TET2 | DNMT1 | DNMT3A | DNMT3B |
|--------|------|------|-------|--------|--------|
| TET1   | 1.00 | 0.84 | 0.26  | 0.10   | 0.32   |
| TET2   | 0.84 | 1.00 | 0.17  | 0.04   | 0.33   |
| DNMT1  | 0.26 | 0.17 | 1.00  | 0.06   | -0.05  |
| DNMT3A | 0.10 | 0.04 | 0.06  | 1.00   | 0.36   |
| DNMT3B | 0.32 | 0.33 | -0.05 | 0.36   | 1.00   |

**Supplementary Figure 6: Additional data regarding the LC-MS TET activity assays.** **a** Characteristic ion transitions used in this work. **b** Examples of calibration curves determined for 5mdC, 5hmdC, 5fdC and 5cadC. **c** Examples of LC profiles of standard peaks and peaks obtained from TET oxidation reactions.

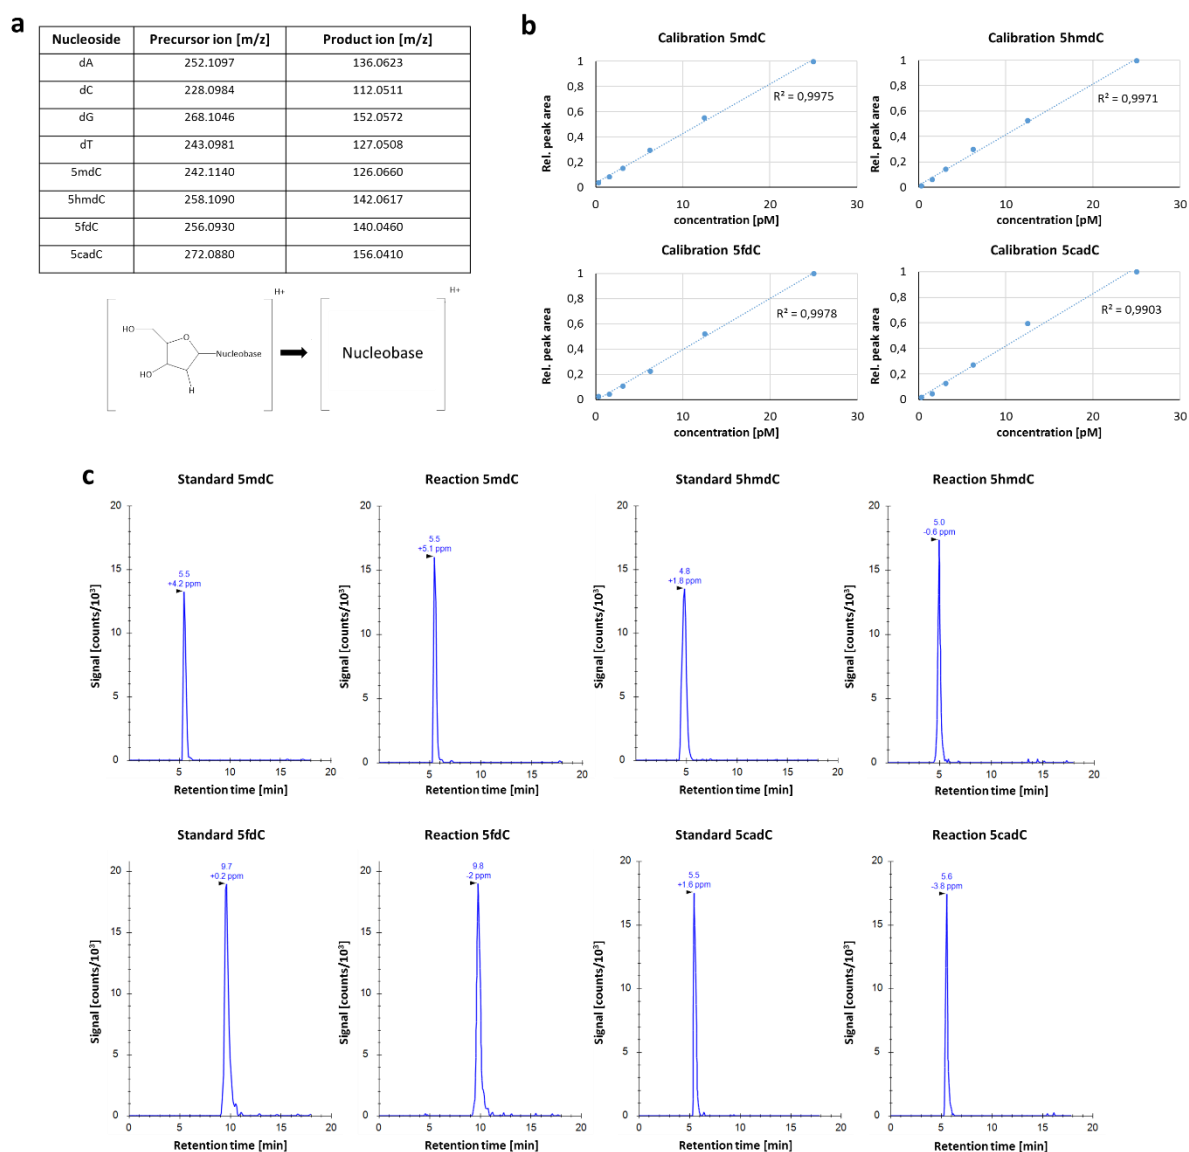

**Supplementary Figure 7: Fitting of kinetic data requires a processive reaction step.** Two examples of fits of reaction progress curves (here for TET1 reacting with the preferred substrate) are shown, which either include a processive step that directly converts 5mC to 5fC and is described by the  $k_{12}$  rate constant or not include this step. Note the much worse fit in the right panel. “Exp” refers to the experimental data, “Fit” to the curves showing the best possible fit of the data to the corresponding model.

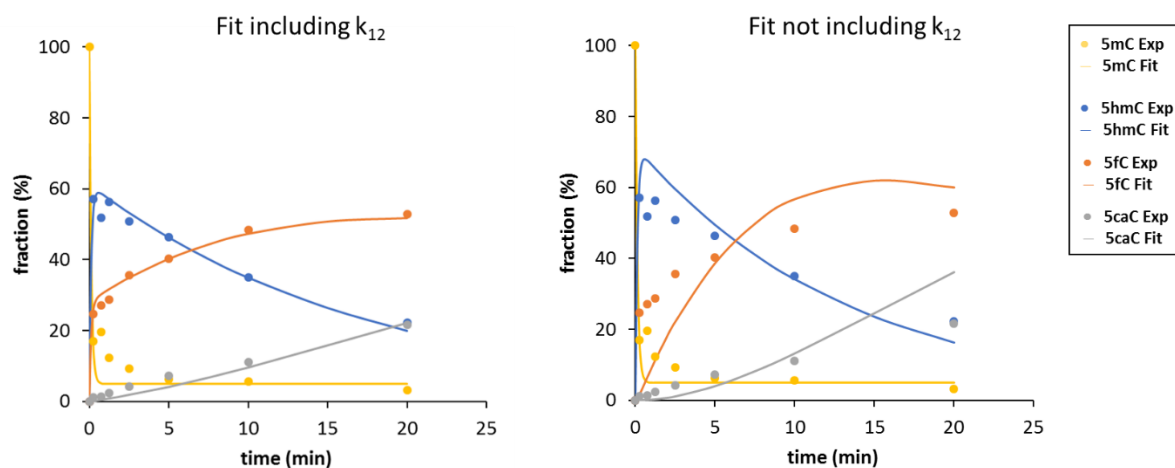

**Supplementary Figure 8: Compilation of the correlation of mCpX oxidation flank preferences.**  
Correlation of mCpX -4 to +4 flanking sequence preferences observed in the individual experimental repeats with TET1, TET2 V1 and TET2 V2. The figures show Pearson correlation factors.

| TET1 |    | CpG  |      | CpA  |      | CpT  |      | CpC  |      |
|------|----|------|------|------|------|------|------|------|------|
|      |    | R1   | R2   | R1   | R2   | R1   | R2   | R1   | R2   |
| CpG  | R1 | 1.00 | 0.99 | 0.83 | 0.84 | 0.81 | 0.84 | 0.92 | 0.91 |
|      | R2 | 0.99 | 1.00 | 0.84 | 0.85 | 0.80 | 0.84 | 0.91 | 0.91 |
| CpA  | R1 | 0.83 | 0.84 | 1.00 | 0.99 | 0.65 | 0.68 | 0.89 | 0.89 |
|      | R2 | 0.84 | 0.85 | 0.99 | 1.00 | 0.66 | 0.69 | 0.92 | 0.91 |
| CpT  | R1 | 0.81 | 0.80 | 0.65 | 0.66 | 1.00 | 0.90 | 0.82 | 0.81 |
|      | R2 | 0.84 | 0.84 | 0.68 | 0.69 | 0.90 | 1.00 | 0.81 | 0.81 |
| CpC  | R1 | 0.92 | 0.91 | 0.89 | 0.92 | 0.82 | 0.81 | 1.00 | 0.96 |
|      | R2 | 0.91 | 0.91 | 0.89 | 0.91 | 0.81 | 0.81 | 0.96 | 1.00 |

| TET2 |    | CpG  |      | CpA  |      | CpT  |      | CpC  |      |
|------|----|------|------|------|------|------|------|------|------|
|      |    | R1   | R2   | R1   | R2   | R1   | R2   | R1   | R2   |
| CpG  | R1 | 1.00 | 1.00 | 0.89 | 0.82 | 0.62 | 0.61 | 0.92 | 0.92 |
|      | R2 | 1.00 | 1.00 | 0.88 | 0.81 | 0.62 | 0.61 | 0.92 | 0.92 |
| CpA  | R1 | 0.89 | 0.88 | 1.00 | 0.95 | 0.45 | 0.47 | 0.83 | 0.81 |
|      | R2 | 0.82 | 0.81 | 0.95 | 1.00 | 0.45 | 0.46 | 0.78 | 0.76 |
| CpT  | R1 | 0.62 | 0.62 | 0.45 | 0.45 | 1.00 | 0.94 | 0.73 | 0.71 |
|      | R2 | 0.61 | 0.61 | 0.47 | 0.46 | 0.94 | 1.00 | 0.72 | 0.70 |
| CpC  | R1 | 0.92 | 0.92 | 0.83 | 0.78 | 0.73 | 0.72 | 1.00 | 0.99 |
|      | R2 | 0.92 | 0.92 | 0.81 | 0.76 | 0.71 | 0.70 | 0.99 | 1.00 |

**Supplementary Figure 9: Comparison of genomic NNCGNN 5hmC patterns in lung and liver cells revealing very high similarity.** Data were taken from <sup>4</sup>. The Pearson correlation coefficient of both distributions is 0.98. The heatmap scale is between zero and the relative maximum of each sample.

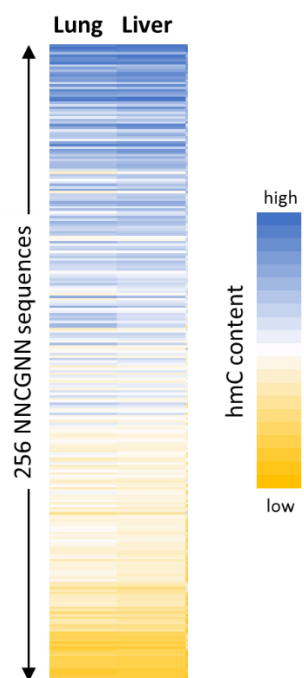

**Supplementary Figure 10: Schematic drawing of the TET1 and TET2 enzyme constructs used in this study.** For details see the main text.

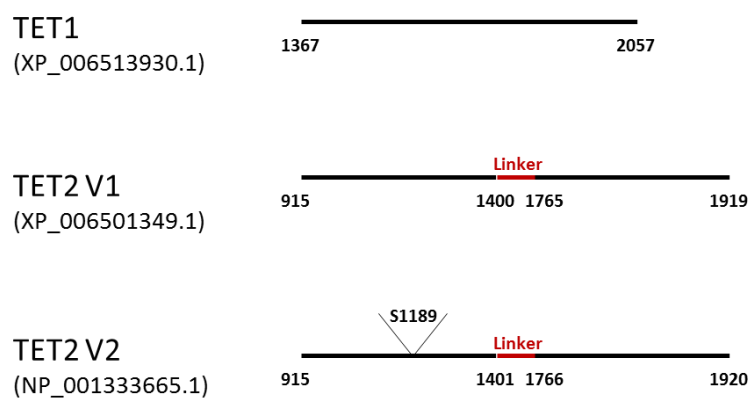

Supplementary Figure 11: Uncropped gels of Figure 3d and e.

Figure 3d

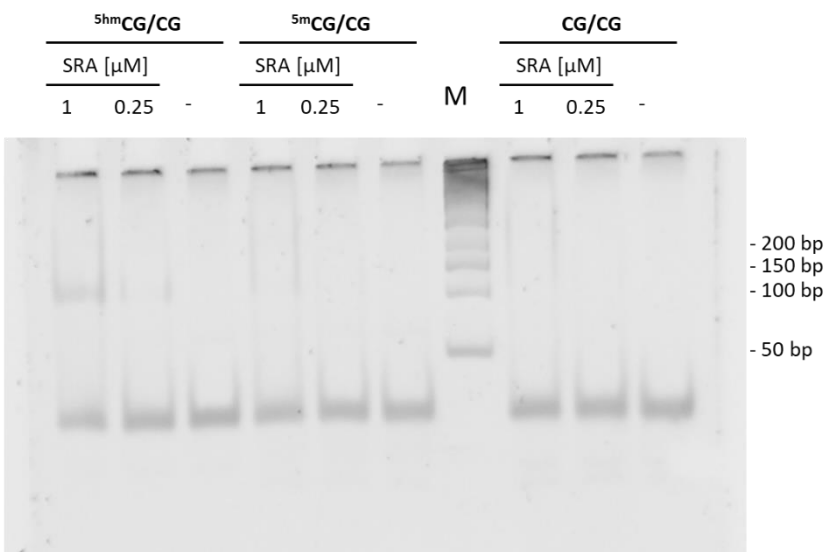

Figure 3e

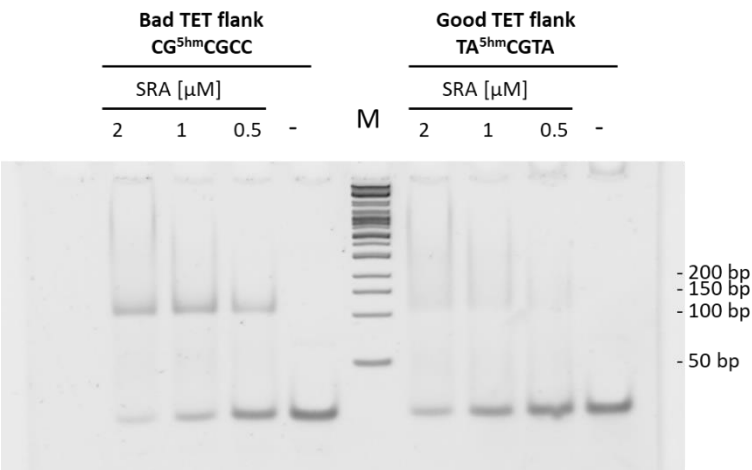

## Supplementary References

- 1 Jeltsch, A., Adam, S., Dukatz, M., Emperle, M. & Bashtrykov, P. Deep enzymology studies on DNA methyltransferases reveal novel connections between flanking sequences and enzyme activity. *J Mol Biol*, 167186 (2021).
- 2 Adam, S. *et al.* DNA sequence-dependent activity and base flipping mechanisms of DNMT1 regulate genome-wide DNA methylation. *Nature communications* **11**, 3723 (2020).
- 3 Gao, L. *et al.* Comprehensive structure-function characterization of DNMT3B and DNMT3A reveals distinctive de novo DNA methylation mechanisms. *Nature communications* **11**, 3355 (2020).
- 4 Li, X., Liu, Y., Salz, T., Hansen, K. D. & Feinberg, A. Whole-genome analysis of the methylome and hydroxymethylome in normal and malignant lung and liver. *Genome Res* **26**, 1730-1741 (2016).
